# Supplementary material
Source: publisher figshare collection journal article supplement (https://gsajournals.figshare.com/articles/dataset/_/14054156)
Supplement: Supplementary file 1 [file 1]

## Sheet: Sheet1
Table S1: Sequencing depth on chromosome 4 of sequenced isolates displaying I-SceI-dependent BIR/MCO. *
Strain		Cov Chr4 by kb	Log2 Cov Chr4 by kb	SD Chr4 by kb	Strain		Cov Chr4 by kb	Log2 Cov Chr4 by kb	SD Chr4 by kb
Htz WT		167.956	0.97	0.22	Htz WT		208.583	0.975342	0.222458
WT CEC4430 I-SceI HapA + GPI16	1	135.007	0.959392	0.46159	WT CEC4429 I-SceI HapB + GPI16	1	214.011	0.952892	0.409903
	2	93.657	0.9622	0.365061		2	192.144	0.974443	0.227361
	3	112.705	0.956928	0.466071		3	188.113	0.964676	0.261502
	4	141.365	0.961864	0.465678		4	187.538	0.945112	0.333797
	5	105.572	0.960872	0.545656		5	181.699	0.954688	0.281259
pol32-/- CEC5503 I-SceI HapA + GPI16	1	151.36	0.941875	0.497561	pol32-/- CEC5508 I-SceI HapB + GPI16	1	174.498	0.947867	0.281934
	2	153.826	0.911697	0.392625		2	192.799	0.931097	0.480885
	3	172.303	0.962505	0.469176		3	173.483	0.959506	0.454251
	4	114.924	0.94268	0.458358		4	151.656	0.933595	0.395733
	5	156.886	0.962241	0.383551		5	163.143	0.965435	0.341212
msh2-/- CEC5504 I-SceI Hapa + GPI16	1	154.752	0.954483	0.419304	msh2-/- CEC5509 I-SceI HapB + GPI16	1	205.843	0.941143	0.474164
	2	164.777	0.964774	0.406975		2	171.042	0.950953	0.46819
	3	155.966	0.96357	0.338671		3	173.381	0.970961	0.258241
	4	134.806	0.949441	0.419334		4	208.574	0.98334	0.247888
	5	135.87	0.949656	0.508159		5	167.428	0.983777	0.244853
mph1-/- CEC5506 I-SceI HapA + GPI16	1	170.47	0.95686	0.493302	mph1-/- CEC5511 I-SceI HapB + GPI16	1	130.181	0.972	0.290417
	2	185.548	0.849286	0.571414		2	140.977	0.978403	0.292991
	3	164.133	0.963483	0.376578		3	129.425	0.969557	0.293351
	4	132.58	0.969681	0.395903		4	174.681	0.977532	0.290599
	5	138.561	0.945322	0.479698		5	126.66	0.978934	0.292543
mus81-/- CEC5507 I-SceI HapA + GPI16	1	197.122	1.06197	0.524427	mus81-/- CEC5512 I-SceI HapB + GPI16	1	152.937	1.19863	0.241417
	2	167.694	1.16498	0.671626		2	211.768	1.8204	0.874625
	3	176.909	0.919504	0.513175		3	128.411	0.973289	0.219594
	4	211.838	0.937067	0.503969		4	126.81	0.990007	0.22022
						5	134.97	1.21282	0.254657
* aneuploidies are written in red
