# Supplementary material
Source: publisher figshare collection journal article supplement (https://gsajournals.figshare.com/articles/dataset/_/14054156)
Supplement: Supplementary file 3 [file 1]

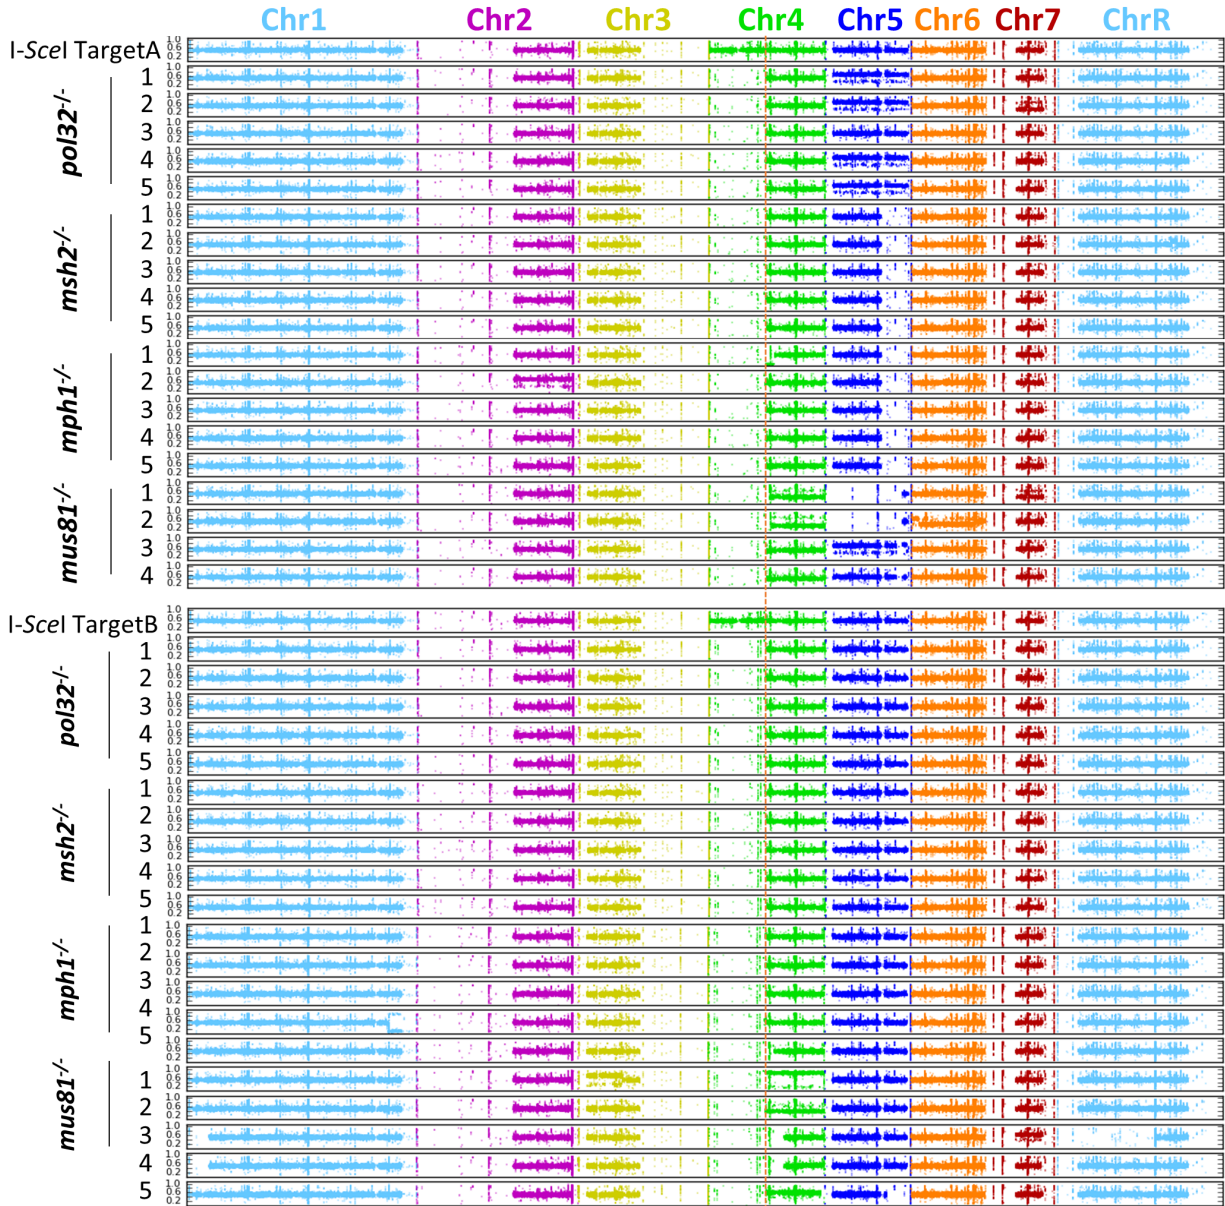

**Figure S6: Allele balance at heterozygous site plots for all knock-out *C. albicans* isolates sequenced in this study.**

Plots showing the allele balance at heterozygous sites across the 8 chromosomes. Sequencing confirms the presence of homozygosity, a long tract LOH, on the left arm of Chr4 (either haplotype A or B according to the strain) in mono-fluorescent isolates. The orange vertical line on Chr4 represents the I-SceI-break site.
