# Supplementary material
Source: publisher figshare collection journal article supplement (https://gsajournals.figshare.com/articles/dataset/_/14054156)
Supplement: Supplementary file 4 [file 1]

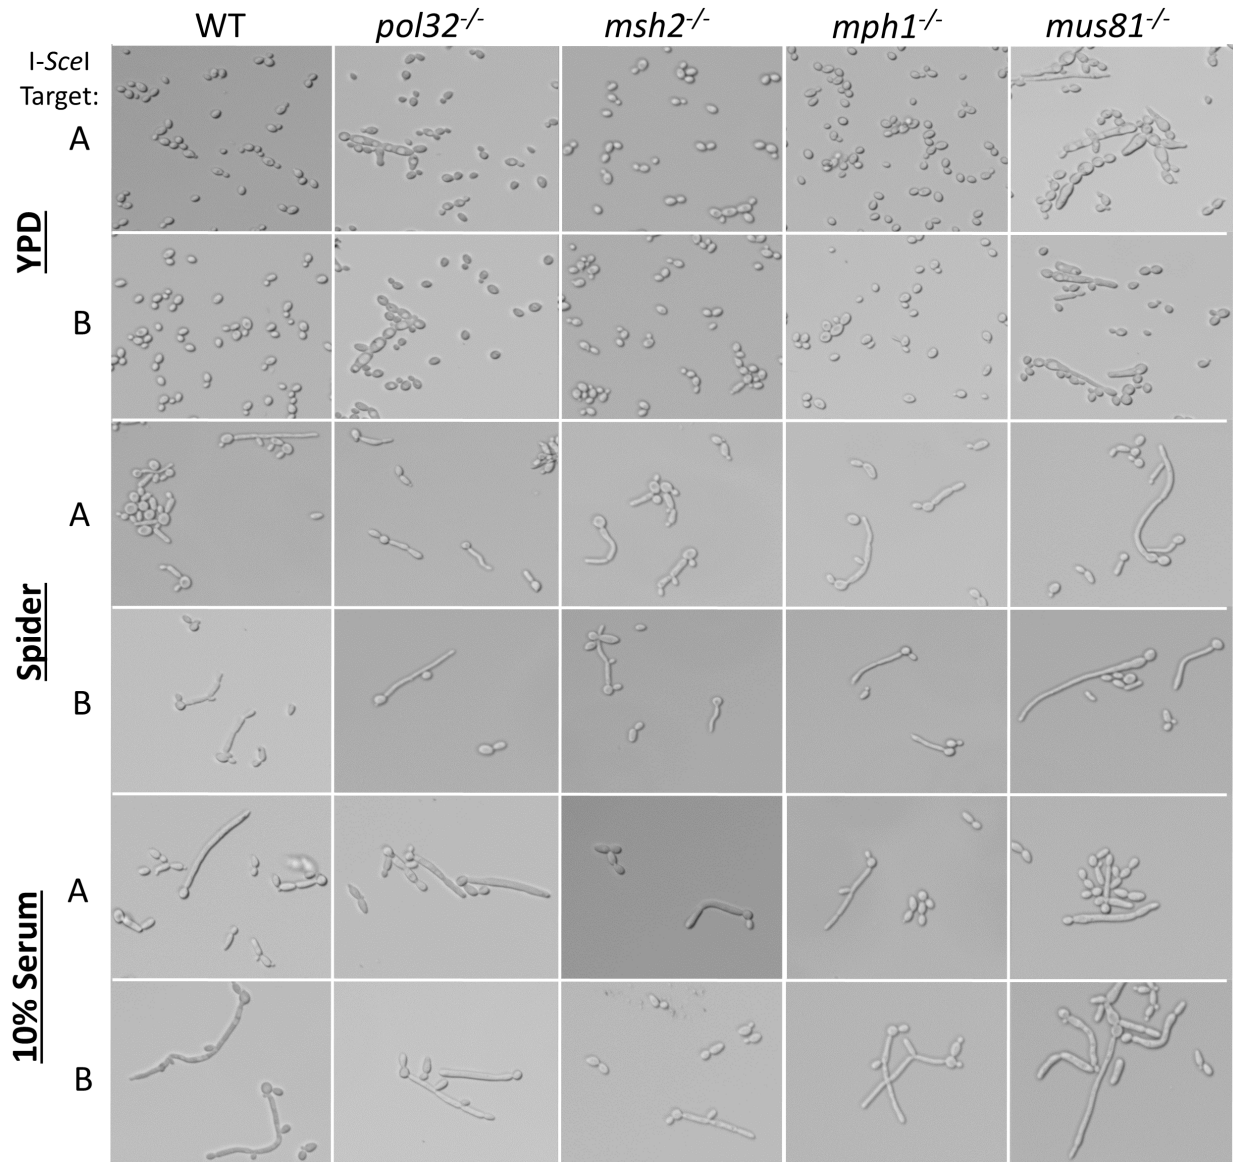

**Figure S5: Filamentation assay.**

Characterization of the filamentation capacity of different genetic backgrounds (*pol32*<sup>-/-</sup>, *msh2*<sup>-/-</sup>, *mph1*<sup>-/-</sup> and *mus81*<sup>-/-</sup>) was observed after 3 - 4h in YPD, Spider medium and YPD + 10% serum broths and imaged with the Olympus IX83 microscope, 20x objective.
