# Supplementary material
Source: publisher figshare collection journal article supplement (https://gsajournals.figshare.com/articles/dataset/_/14054156)
Supplement: Supplementary file 5 [file 1]

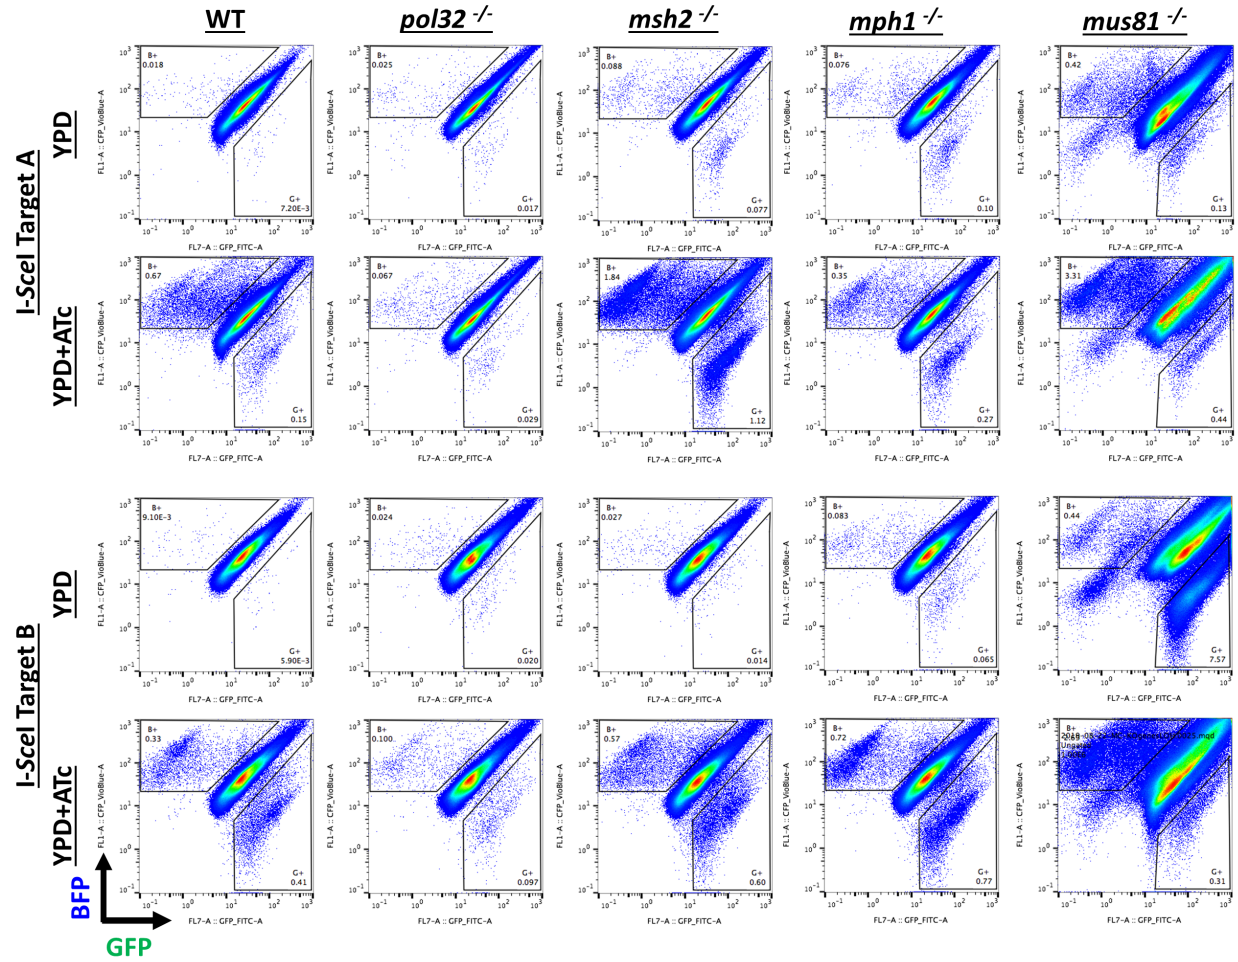

**Figure S3: Flow cytometry profile illustrating genomic stability of wild type and knock-out strains.** Utilization of the BFP/GFP LOH reporter system located on Chr4L to assess genomic stability in standard growth conditions (YPD) and upon I-SceI induction (YPD+ATc) leading to DNA-DSB on Chr4L. Each FACS profile represents a total of 10<sup>6</sup> analyzed cells.
