# Supplementary material
Source: publisher figshare collection journal article supplement (https://gsajournals.figshare.com/articles/dataset/_/14054156)
Supplement: Supplementary file 6 [file 1]

**A.**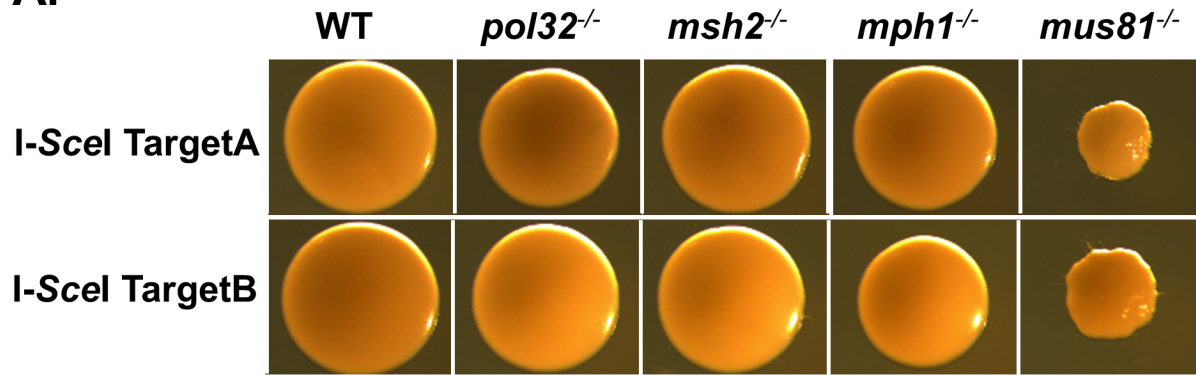**B.**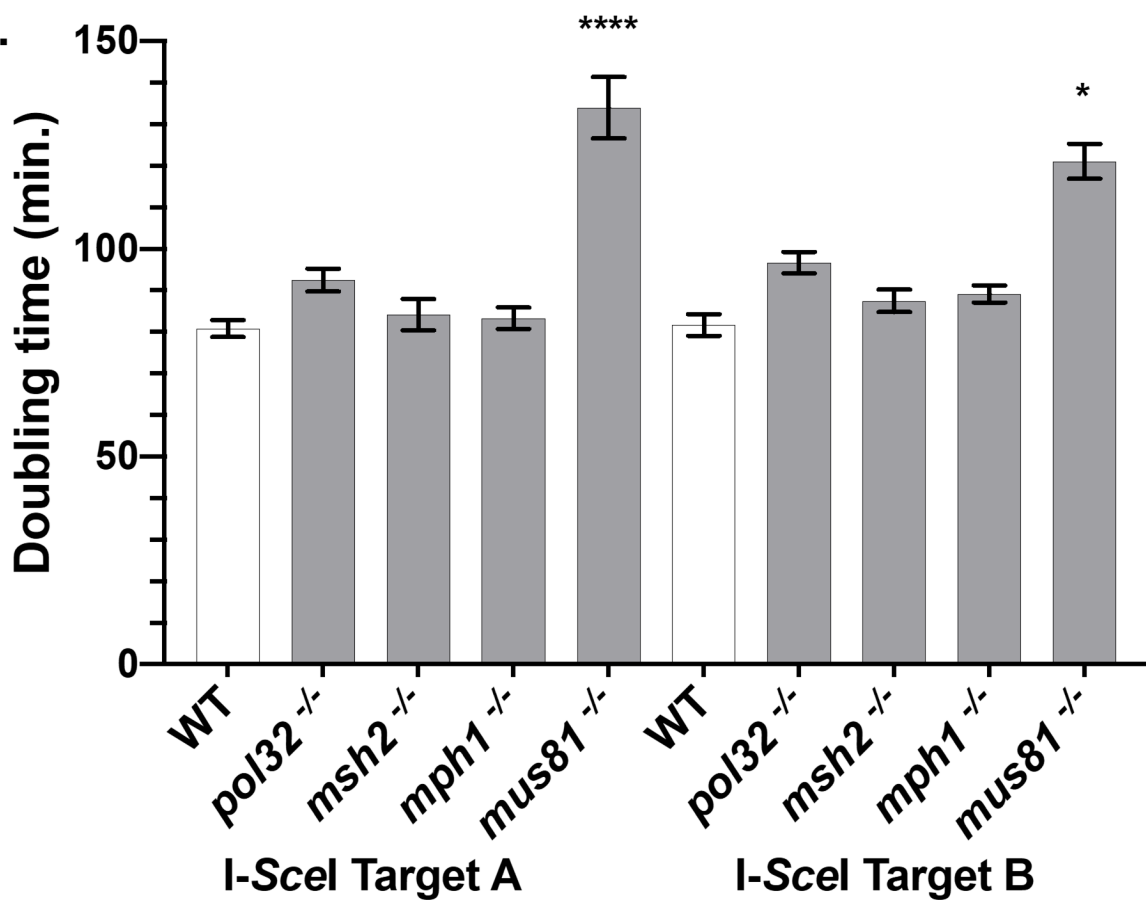**Figure S4: Doubling time.**

**A.** Colony morphology of *C. albicans* strains used in this study. Photos of colonies were taken after 72h of growth on YPD agar at 30°C, using Leica M80 Stereomicroscope at a x25 magnification. **B.** Average doubling time (mins.) evaluated from optical density 24h kinetic at 30°C (n= 5-6), error bars represent standard deviation. Significant differences in doubling times ( $p < 0.0001$ ) between strains was evaluated using the Kruskal-Wallis test, while Dunn's multiple comparisons test revealed that *mus81*<sup>-/-</sup> strains grow significantly slower than the other strains (\*:  $p < 0.05$  and \*\*\*\*:  $p < 0.0001$ ).
